# Supplementary material for: Polar solvent-free room temperature synthesis of CsPbX3 (X = Br, Cl) perovskite nanocubes
Source: Royal Society of Chemistry journal article supplement (doi:10.1039/d3tc00086a), 2023-01-01
Supplement: d3tc00086a1.pdf [file d3tc00086a1.pdf]

*Supporting Information for*

**Polar Solvent Free Room Temperature Synthesis of CsPbX<sub>3</sub> (X =  
Br, Cl) Perovskite Nanocubes**

C. Meric Guvenc<sup>a</sup>, Askin Kocabas<sup>b</sup>, and Sinan Balci<sup>c\*</sup>

<sup>a</sup>Department of Materials Science and Engineering, Izmir Institute of Technology, 35430 Izmir,  
Turkey

<sup>b</sup>Department of Physics, Koc University, Istanbul, 34450, Turkey

<sup>c</sup>Department of Photonics, Izmir Institute of Technology, 35430 Izmir, Turkey

\*E-mail: [sinanbalci@iyte.edu.tr](mailto:sinanbalci@iyte.edu.tr)

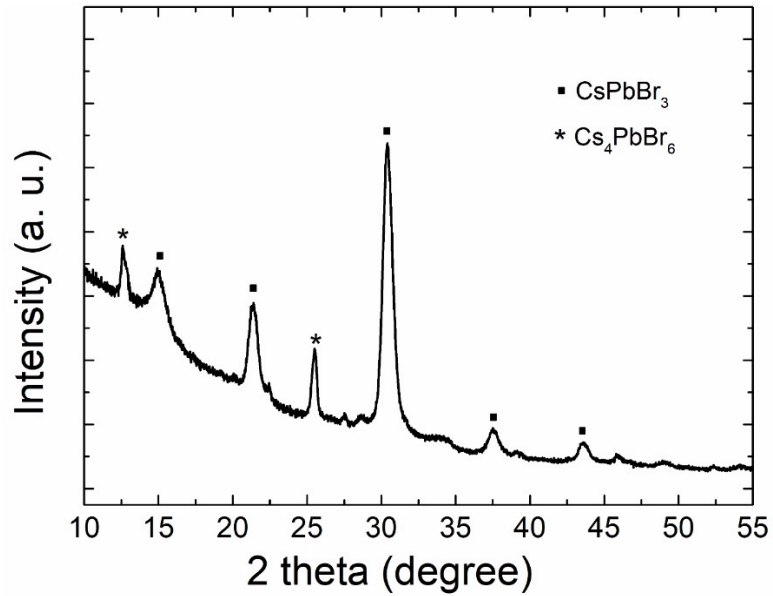

**Figure S1.** XRD pattern shows the formation of both  $\text{CsPbBr}_3$  and  $\text{Cs}_4\text{PbBr}_6$  phases when the molar ratio of Cs/Pb is 2.

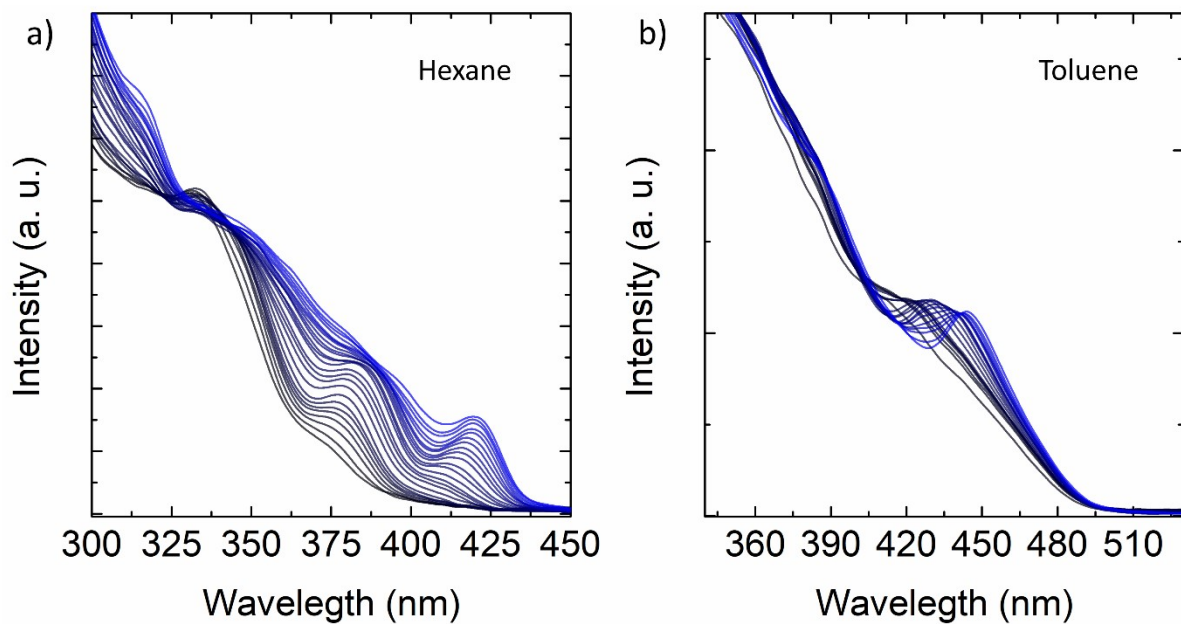

**Figure S2.** In-situ absorption measurement of the synthesis of  $\text{CsPbBr}_3$  nanocrystals without addition of GA-oleate (a) in hexane and (b) in toluene.

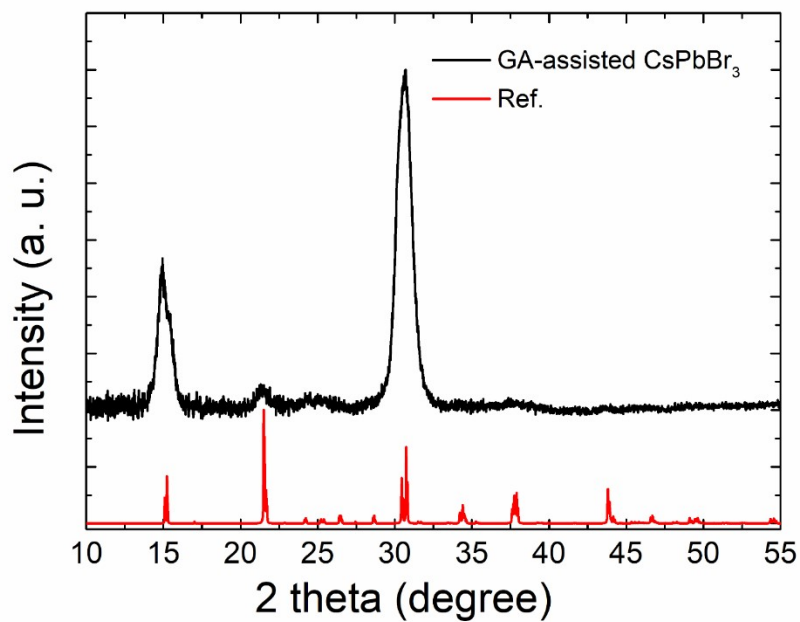

**Figure S3.** Comparison of the XRD patterns of the GA-assisted synthesized CsPbBr<sub>3</sub> nanocubes and reference XRD pattern.<sup>1</sup>

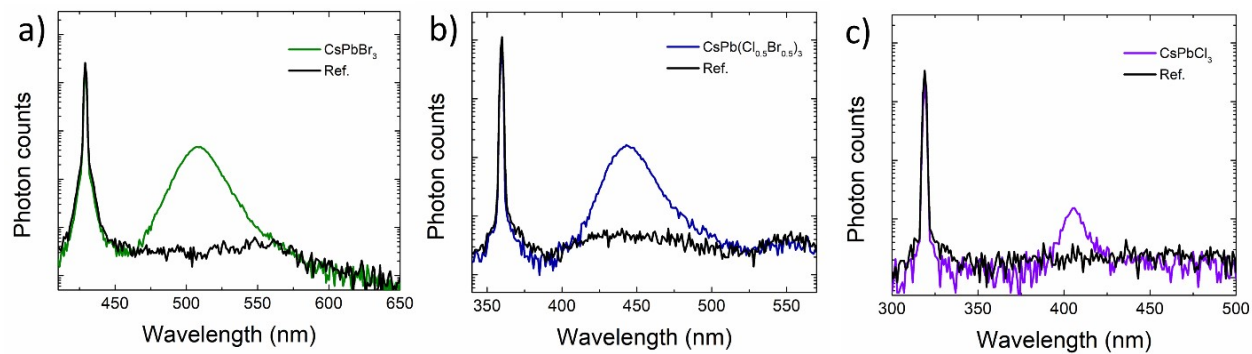

**Figure S4.** The PLQY measurements of the samples. Measurements were done using an integrating sphere.

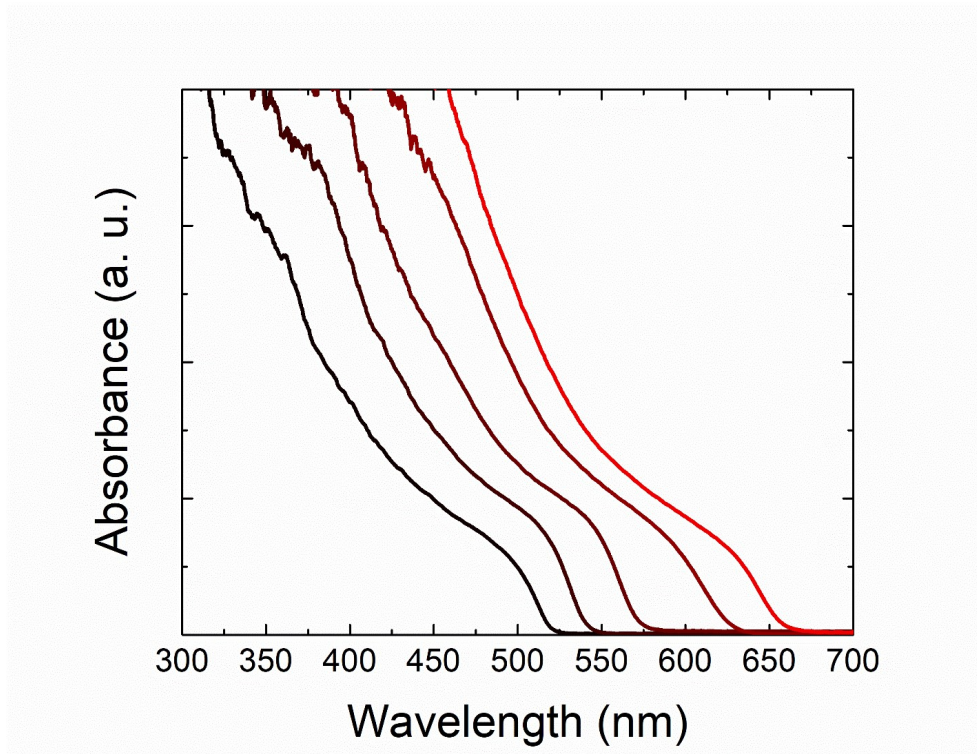

**Figure S5.** Absorption spectra of the halide exchange reaction from CsPbBr<sub>3</sub> to CsPbI<sub>3</sub>.

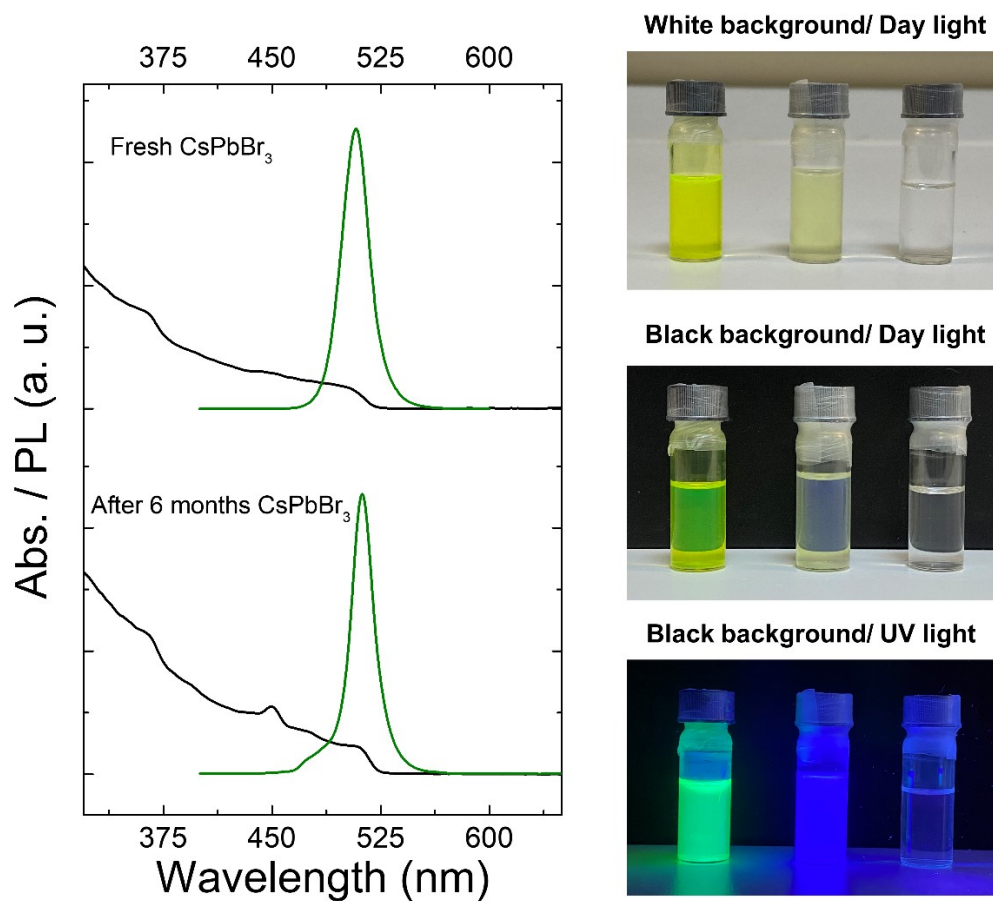

**Figure S6.** On the left-hand panel, absorption and PL spectra of the freshly prepared and six months old CsPbBr<sub>3</sub> nanocubes stored at 2- 8 °C are shown. On the right-hand panel, digital images of the six months old CsPbX<sub>3</sub> (X = Cl, Br) nanocubes are provided.

**Table S1.** Comparison of average size and optical properties of the perovskite nanocrystals synthesized at room temperature.

|                                                           | PL (nm)                             | PL FWHM        | Average Particle Size (nm)           | PLQY (%) | $\tau_{avg}$ (ns) |
|-----------------------------------------------------------|-------------------------------------|----------------|--------------------------------------|----------|-------------------|
| <b>MAPbBr<sub>3</sub><sup>2</sup></b>                     | 515                                 | 21 nm (96 meV) | 3.3                                  | 50-70    | 13.54             |
| <b>CsPbBr<sub>3</sub><sup>3</sup></b>                     | 517- 501 depend on rection duration | 16- 19 nm      | 13.6- 6.8 depend on rection duration | Above 80 | -                 |
| <b>CsPbBr<sub>3</sub> (RT synthesis only)<sup>4</sup></b> | 468                                 | 230 meV        | 3.4                                  | -        | -                 |
| <b>CsPbBr<sub>3</sub><sup>5</sup></b>                     | 511-515                             | 18- 20 nm      | 12.7 nm                              | 80-85    | 11.4              |
| <b>CsPbBr<sub>3</sub><sup>6</sup></b>                     | 515                                 | 18 nm          | 10 nm                                | 93       | 8.63              |
| <b>CsPbBr<sub>3</sub> (Our method)</b>                    | 508                                 | 21 nm          | 14 nm                                | 85       | 18.98             |

## REFERENCES

- (1) Stoumpos, C. C.; Malliakas, C. D.; Peters, J. A.; Liu, Z.; Sebastian, M.; Im, J.; Chasapis, T. C.; Wibowo, A. C.; Chung, D. Y.; Freeman, A. J.; Wessels, B. W.; Kanatzidis, M. G. Crystal Growth of the Perovskite Semiconductor CsPbBr<sub>3</sub>: A New Material for High-Energy Radiation Detection. *Cryst Growth Des* **2013**, *13* (7), 2722–2727. <https://doi.org/10.1021/cg400645t>.
- (2) Zhang, F.; Zhong, H.; Chen, C.; Wu, X.; Hu, X.; Huang, H.; Han, J.; Zou, B.; Dong, Y. Brightly Luminescent and Color-Tunable Colloidal CH<sub>3</sub>NH<sub>3</sub>PbX<sub>3</sub> (X = Br, I, Cl) Quantum Dots: Potential Alternatives for Display Technology. *ACS Nano* **2015**, *9* (4), 4533–4542. <https://doi.org/10.1021/acs.nano.5b01154>.
- (3) Brown, A. A. M.; Vashishtha, P.; Hooper, T. J. N.; Ng, Y. F.; Nutan, G. v.; Fang, Y.; Giovanni, D.; Tey, J. N.; Jiang, L.; Damodaran, B.; Sum, T. C.; Pu, S. H.; Mhaisalkar, S. G.; Mathews, N. Precise Control of CsPbBr<sub>3</sub> Perovskite Nanocrystal Growth at Room Temperature: Size Tunability and Synthetic Insights. *Chemistry of Materials* **2021**, *33* (7), 2387–2397. <https://doi.org/10.1021/acs.chemmater.0c04569>.

- (4) Almeida, G.; Ashton, O. J.; Goldoni, L.; Maggioni, D.; Petralanda, U.; Mishra, N.; Akkerman, Q. A.; Infante, I.; Snaith, H. J.; Manna, L. The Phosphine Oxide Route toward Lead Halide Perovskite Nanocrystals. *J Am Chem Soc* **2018**, *140* (44), 14878–14886. <https://doi.org/10.1021/jacs.8b08978>.
- (5) Wei, S.; Yang, Y.; Kang, X.; Wang, L.; Huang, L.; Pan, D. Homogeneous Synthesis and Electroluminescence Device of Highly Luminescent CsPbBr<sub>3</sub> Perovskite Nanocrystals. *Inorg Chem* **2017**, *56* (5), 2596–2601. <https://doi.org/10.1021/acs.inorgchem.6b02763>.
- (6) Song, J.; Li, J.; Xu, L.; Li, J.; Zhang, F.; Han, B.; Shan, Q.; Zeng, H. Room-Temperature Triple-Ligand Surface Engineering Synergistically Boosts Ink Stability, Recombination Dynamics, and Charge Injection toward EQE-11.6% Perovskite QLEDs. *Advanced Materials* **2018**, *30* (30), 1800764. <https://doi.org/10.1002/adma.201800764>.
